# Supplementary material
Source: bioRxiv or medRxiv preprint supplement (https://www.biorxiv.org/highwire/filestream/80174/field_highwire_adjunct_files/0/228809-1.pdf)
Supplement: Supplementary file [file 228809-1.pdf]

**Table S1. Plasmids used in this study**

| <b>Lab number</b> | <b>Lab name</b>                               | <b>Description</b>                                                                          | <b>Abbreviation</b> | <b>Reference</b> |
|-------------------|-----------------------------------------------|---------------------------------------------------------------------------------------------|---------------------|------------------|
| <b>UK105</b>      | eIF2a-NM_pET30a                               | His6-tagged mouse eIF2a 1-185 pET-30a(+)"                                                   | eIF2a               | PMID 15341733    |
| <b>UK168</b>      | PerkKD-pGEX4T-1                               | Bacterial expression plasmid for mouse PERK kinase domain                                   | PERK                | PMID 9930704     |
| <b>UK622</b>      | PGV_PP1G_1-323_V1                             | Bacterial expression plasmid for full-length PP1 phosphatase catalytic domain               | PP1G                | PMID 25774600    |
| <b>UK1920</b>     | huPPP1R15A_533_624_male_pGEX_TEV_AviTag (MP1) | Bacterial expression plasmid for N-tern AviTagged human GADD34 533-624                      | R15A533-624-MBP     | PMID: 28447936   |
| <b>UK1921</b>     | huPPP1R15A_325_636_male_pGEX_TEV_AviTag (MP4) | Bacterial expression plasmid for N-tern AviTagged human GADD34 325-624                      | R15A325-636-MBP     | PMID: 28447936   |
| <b>UK2260</b>     | MBP_huPPP1R15A_325-636_H6_pMAL-c5X-His        | Bacterial expression plasmid for MBP_R15A(325-636)-H6                                       | MBP-R15A325-636     | PMID: 28759048   |
| <b>UK2261</b>     | MBP_huPPP1R15A_325-512_H6_pMAL-c5X-His        | Bacterial expression plasmid for MBP_R15A(325-512)-H6 (N-term)                              | MBP-R15A325-512     | PMID: 28759048   |
| <b>UK2264</b>     | PP1A_7-330_RP1B (MPC)                         | Bacterial expression plasmid for H6-TEV-rabbit PP1A 7-330 Peti lab (Addgene Plasmid# 26566) | PP1a                | PMID: 18992256   |

**Table S2. Number of repeats for the different experiments**

|    | <b>Figures</b> | <b>Repeats</b> |
|----|----------------|----------------|
| 1  | a              | n/a            |
|    | b              | 4              |
|    | c              | 3              |
| 2  | a              | 3              |
|    | b              | 3              |
|    | c              | 3              |
| 3  | a              | 2              |
|    | b              | 2              |
| 4  | a              | 3              |
|    | b              | 2              |
| 5  | a              | 3              |
|    | b              | 2              |
| S1 | a              | 1              |
|    | b              | 1              |
| S2 | a              | n/a            |
|    | b              | 1              |
